# Supplementary material for: Solvent-polarity-tuned nanostructures assembled from modified octadecylcarbamate with an anthracen moiety
Source: Royal Society of Chemistry journal article supplement (doi:10.1039/c6ra14563a), 2016-01-01
Supplement: c6ra14563a1.pdf [file c6ra14563a1.pdf]

## Electronic Supplementary Information

### **RSC Advances**

#### Solvent-polarity-tuned nanostructures assembled from modified octadecylcarbamate with anthracen moiety

Yimeng Zhang, Pengyao Xing, Minmin Yang, Yajie Wang, Bo Wang, Aiyu Hao\* and Mingfang Ma

Key Laboratory of Colloid and Interface Chemistry of Ministry of Education, School of Chemistry and Chemical Engineering, Shandong University, Jinan 250100, P. R. China.

E-mail: haoay@sdu.edu.cn; Fax: + 86 531 88564464; Tel: + 86 531 8836330

## Synthesis of A-9-YMOC

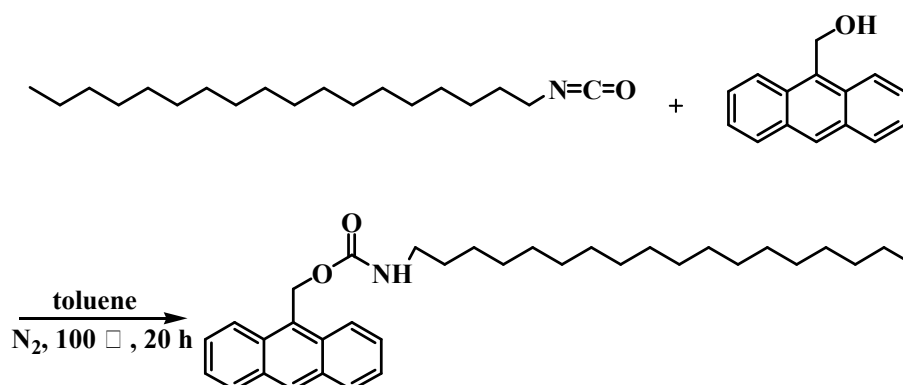

**Scheme S1** Chemical structure and synthesis of A-9-YMOC

## Characterization of A-9-YMOC

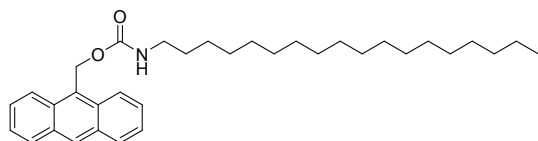

### Anthracen-9-ylmethyl octadecylcarbamate

<sup>1</sup>H NMR (400 MHz, CDCl<sub>3</sub>): δ(ppm) 8.51 (s, 1H), 8.41 (d, *J* = 8.9 Hz, 2H), 8.04 (d, *J* = 8.4 Hz, 2H), 7.64 – 7.55 (m, 2H), 7.55 – 7.47 (m, 2H), 6.16 (s, 2H), 4.67 (brs, 1H), 3.22 (dd, *J* = 13.1, 6.6 Hz, 2H), 1.49 (s, 2H), 1.30 – 1.21 (m, 30H), 0.89 (t, *J* = 6.8 Hz, 3H); <sup>13</sup>C NMR (101 MHz, CDCl<sub>3</sub>) δ 156.9, 131.7, 131.3, 129.3, 129.2, 127.1, 126.8, 125.3, 124.4, 59.3, 41.4, 32.2, 30.2, 29.9, 29.9, 29.8, 29.8, 29.7, 29.6, 29.5, 26.9, 22.9, 14.3, 0.2; ESI-MS *m/z*: calcd 526.3656; found 526.3737 (M + Na<sup>+</sup>).

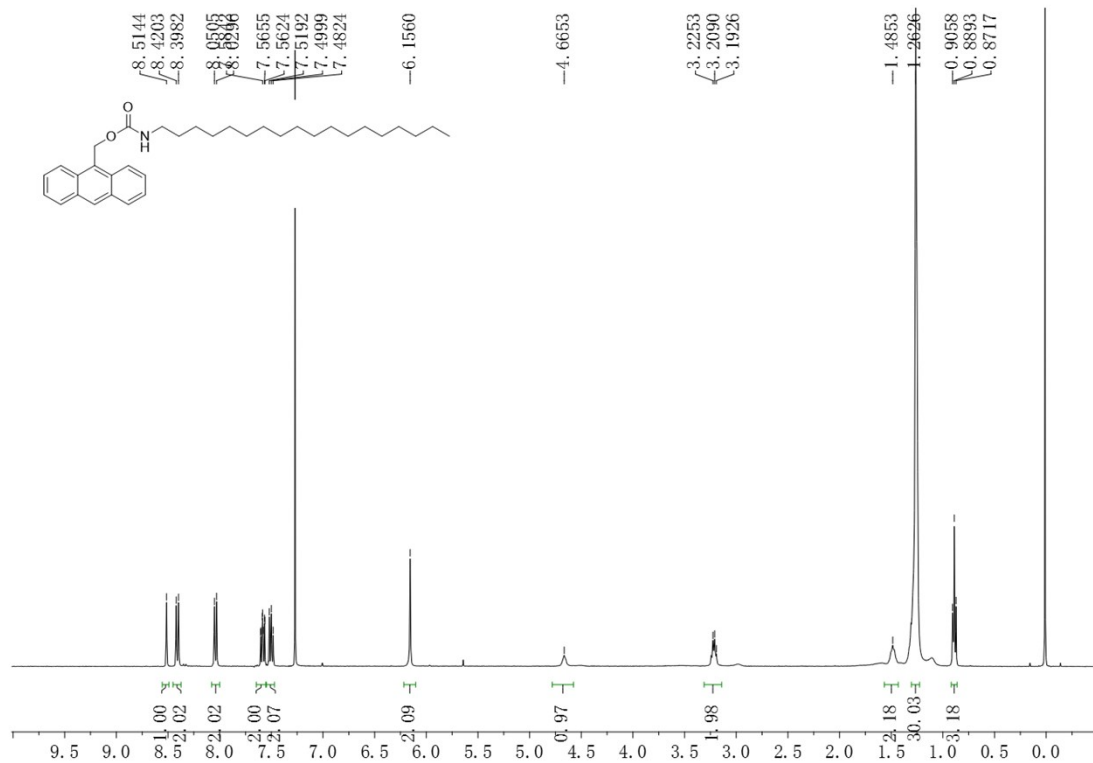

Figure S1  $^1\text{H}$  NMR of A-9-YMOC

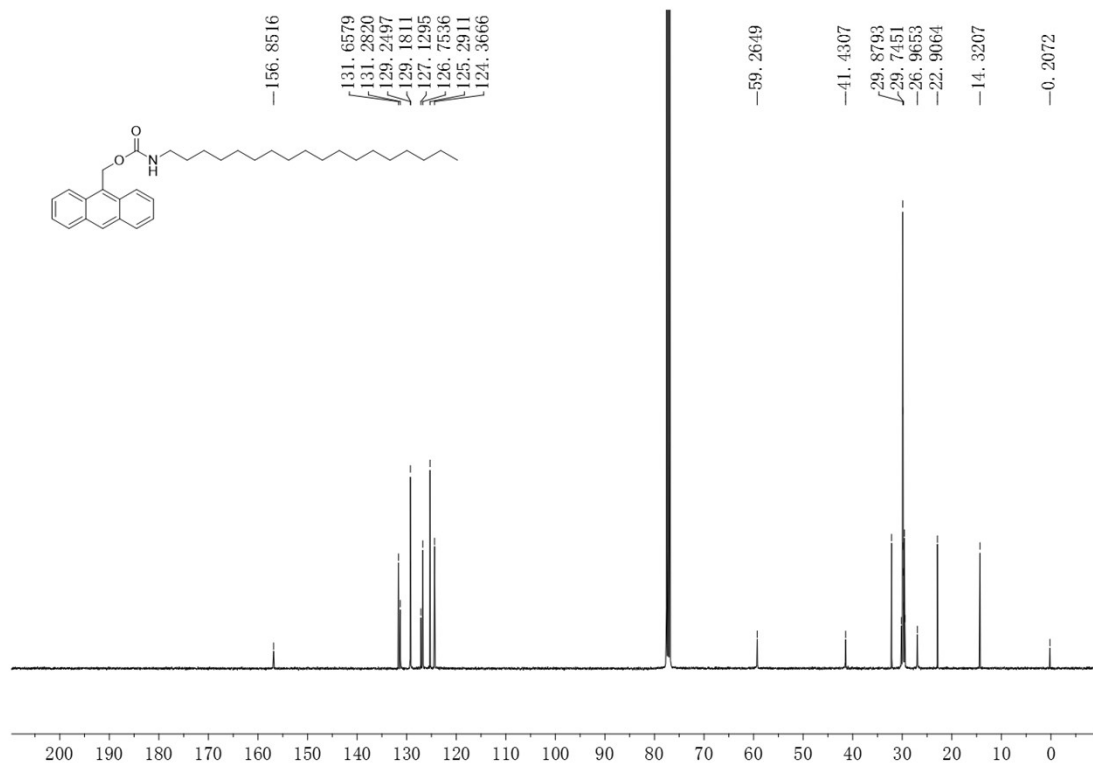

Figure S2  $^{13}\text{C}$  NMR of A-9-YMOC

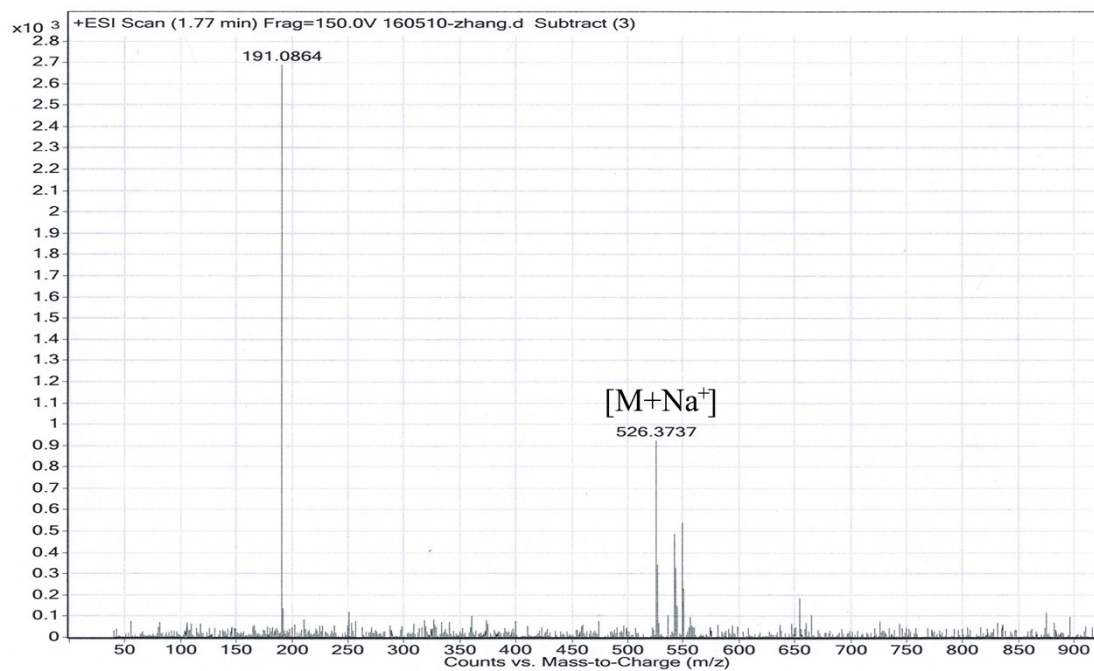

Figure S3 MS of A-9-YMOC

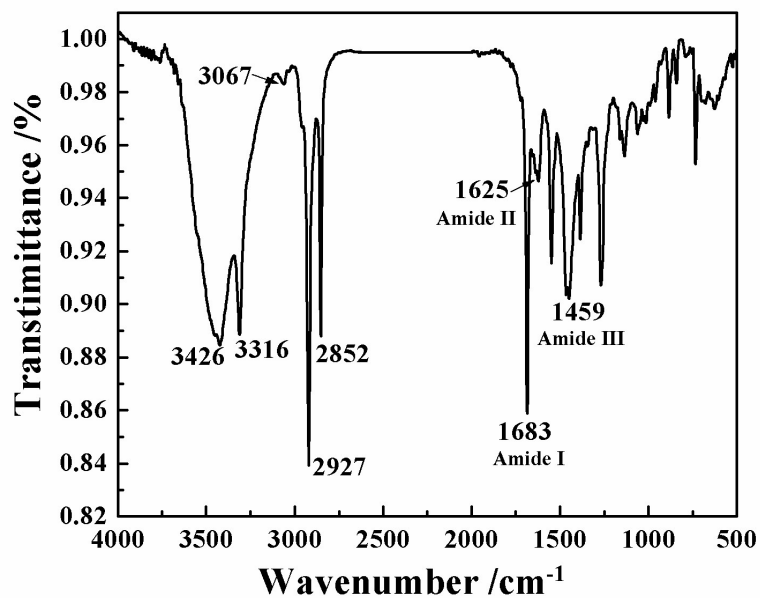

Figure S4 FT-IR of A-9-YMOC

## Rheological characterization of A-9-YMOC gel

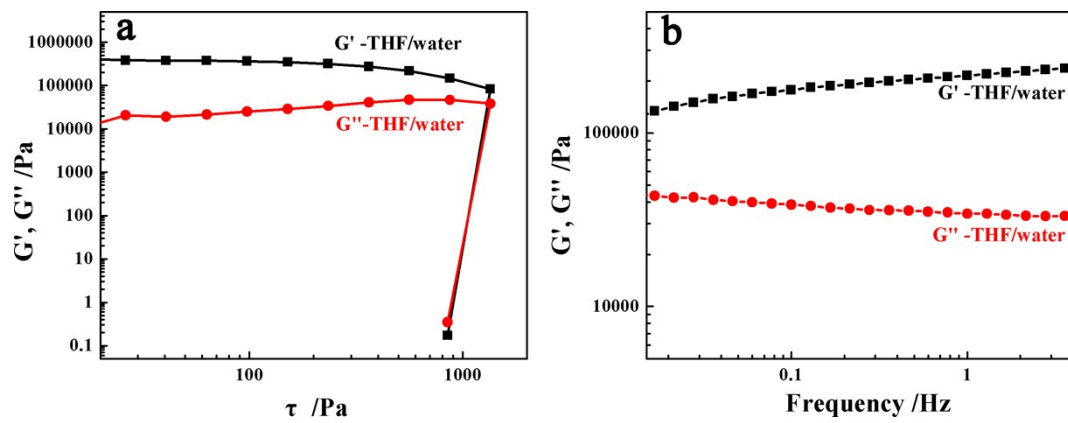

**Figure S5** a) Dynamic oscillatory stress sweep and b) frequency sweep of A-9-YMOC gel in THF/water (2/8, v/v), c = 1 wt%.
